# Supplementary material for: A phenome-wide association study of uterine fibroids reveals a marked burden of comorbidities
Source: Springer Nature journal article supplement (doi:10.1038/s43856-025-00884-w), 2025-05-15
Supplement: MOESM1 [file 43856_2025_884_MOESM1_ESM.pdf]

# Supplementary Fig 1.

## Analyses and Results

### Flow Diagram

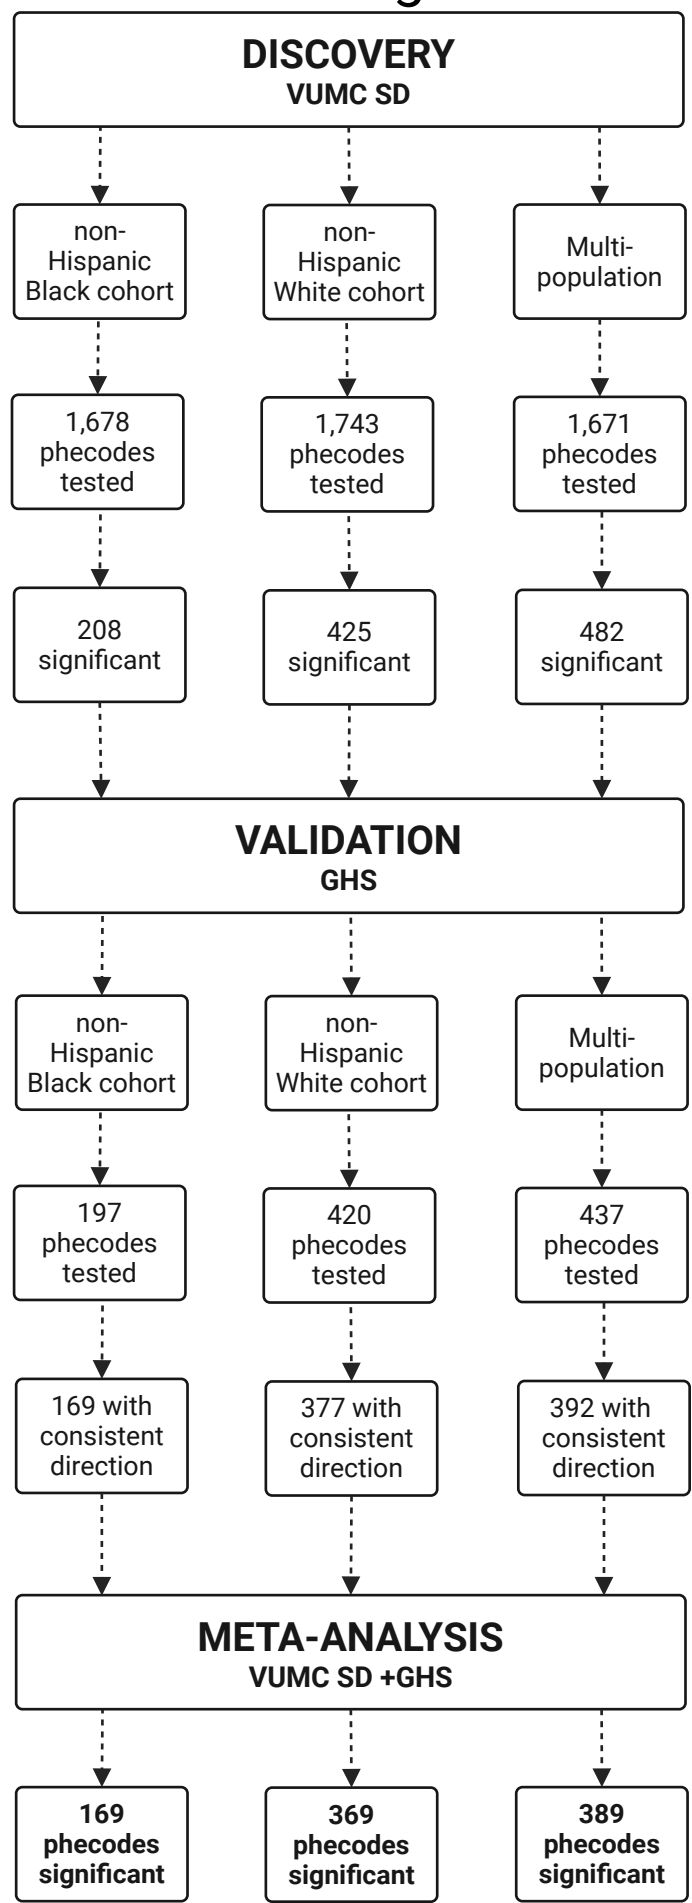

**Supplemental Figure 1. legend:** Flow diagram illustrating the analytical steps and the number of phecodes that were tested and/or significant in subsequent analysis.
